# Supplementary material for: Mouse Model of Cat Allergic Rhinitis and Intranasal Liposome-Adjuvanted Refined Fel d 1 Vaccine
Source: PubMed Central journal article supplement (PMC4783078; doi:10.1371/journal.pone.0150463), 2016-03-08
Supplement: pone.0150463.s002.pdf [file pone.0150463.s002.pdf]

## Supporting Information

# Allergic Rhinitis Model of Cat Allergy and Intranasal Liposome-Adjuvanted Refined Fel d 1 Vaccine

Natt Tasaniyananda<sup>1,2</sup>, Urai Chaisri<sup>3</sup>, Anchalee Tungtrongchitr<sup>2</sup>, Wanpen Chaicumpa<sup>2</sup>, Nitat Sookrung<sup>4\*</sup>

<sup>1</sup>Graduate Program in Immunology, Department of Immunology, <sup>2</sup>Laboratory for Research and Technology Development, Department of Parasitology and <sup>4</sup>Office for Research and Development, Faculty of Medicine Siriraj Hospital, Mahidol University, Bangkok 10700, Thailand; <sup>3</sup>Department of Tropical Pathology, Faculty of Tropical Medicine, Mahidol University, Bangkok 10400, Thailand

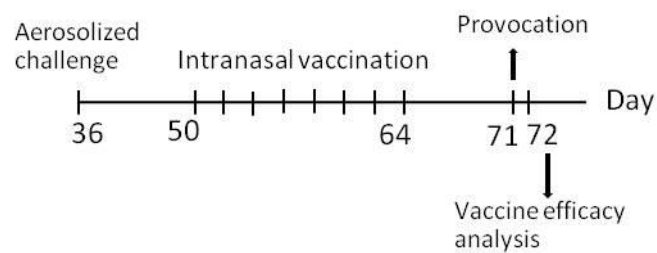

**S2 Fig.** Experimental time-line of vaccination, provocation and vaccine efficacy evaluation.
