# Supplementary material for: Mouse Model of Cat Allergic Rhinitis and Intranasal Liposome-Adjuvanted Refined Fel d 1 Vaccine
Source: PubMed Central journal article supplement (PMC4783078; doi:10.1371/journal.pone.0150463), 2016-03-08
Supplement: pone.0150463.s003.pdf [file pone.0150463.s003.pdf]

## **Supporting Information**

# Allergic Rhinitis Model of Cat Allergy and Intranasal Liposome-Adjuvanted Refined Fel d 1 Vaccine

**Natt Tasaniyananda<sup>1,2</sup>, Urai Chaisri<sup>3</sup>, Anchalee Tungtrongchitr<sup>2</sup>, Wanpen Chaicumpa<sup>2</sup>, Nitat Sookrung<sup>4\*</sup>**

<sup>1</sup>Graduate Program in Immunology, Department of Immunology, <sup>2</sup>Laboratory for Research and Technology Development, Department of Parasitology and <sup>4</sup>Office for Research and Development, Faculty of Medicine Siriraj Hospital, Mahidol University, Bangkok 10700, Thailand; <sup>3</sup>Department of Tropical Pathology, Faculty of Tropical Medicine, Mahidol University, Bangkok 10400, Thailand

**S1 Table. Oligonucleotide Primers Used in Quantitative Real-time PCR for Monitoring Cytokine Gene Expressions.**

| <b>Gene</b>                     | <b>Primer</b>                                                           | <b>Size of PCR product (bp)</b> |
|---------------------------------|-------------------------------------------------------------------------|---------------------------------|
| <i>IL-4</i>                     | F: 5'-TCGGCATT TTTGAACGAGGTC-3'<br>R:5'-GAAAAGCCCGAAAGAGTCTC-3'         | 218                             |
| <i>IL-5</i>                     | F: 5'-ATGATCGTGCCTCTGTGCCTGGAGC-3'<br>R:5'-CTGTTTTTCCTGGAGTAAACTGGGG-3' | 242                             |
| <i>IL-13</i>                    | F: 5'-CGCTGGCGGGTTCTGTGTAG-3'<br>R:5'-GAGGCTGGAGACCGTAGTGGG-3'          | 121                             |
| <i>TNF-<math>\alpha</math></i>  | F: 5'-CATCTTCTCAA AATTCGAGTGACAA-3'<br>R:5'-TGGGAGTAGACAAGGTACAACCC-3'  | 174                             |
| <i>IL-12a (p35)</i>             | F: 5'- CCACCCTTGCCCTCCTAAAC-3'<br>R:5'- GTTTTTCTCTGGCCGTCTTCA -3'       | 132                             |
| <i>IL-12b (p40)</i>             | F: 5'-GGAAGCACGGCAGCAGAATA-3'<br>R:5'-AACTTGAGGGAGAAGTAGGAATGG-3'       | 180                             |
| <i>IL-23 (p19)</i>              | F: 5'-TGCTGGATTGCAGAGCAGTAA-3'<br>R:5'-GCATGCAGAGTTCCGAGAGA-3'          | 121                             |
| <i>IFN-<math>\gamma</math></i>  | F: 5'-AACGCTACACACTGCATCTTGG-3'<br>R:5'-GACTTCAAAGAGTCTGAGG-3'          | 237                             |
| <i>IL-35 (ebi3)</i>             | F: 5'-CAATGCCATGCTTCTCGGTAT-3'<br>R:5'-GGACGTGGATCTGGTGGAGTT-3'         | 84                              |
| <i>IL-10</i>                    | F: 5'-CGGGAAGACAATAACTG-3'<br>R:5'-CATTTCCGATAAGGCTTGG-3'               | 191                             |
| <i>TGF-<math>\beta</math></i>   | F: 5'-CAAGGGCTACCATGCCAACT-3'<br>R:5'-AGGGCCAGGACCTTGCTG-3'             | 84                              |
| <i><math>\beta</math>-actin</i> | F: 5'-GGCCAACCGTGAAAAGATGA-3'<br>R:5'-CACGCTCGGTCAGGATCTTC-3'           | 251                             |
