# Supplementary material for: Mouse Model of Cat Allergic Rhinitis and Intranasal Liposome-Adjuvanted Refined Fel d 1 Vaccine
Source: PubMed Central journal article supplement (PMC4783078; doi:10.1371/journal.pone.0150463), 2016-03-08
Supplement: pone.0150463.s004.pdf [file pone.0150463.s004.pdf]

## Supporting Information

# Allergic Rhinitis Model of Cat Allergy and Intranasal Liposome-Adjuvanted Refined Fel d 1 Vaccine

Natt Tasaniyananda<sup>1,2</sup>, Urai Chaisri<sup>3</sup>, Anchalee Tungtrongchitr<sup>2</sup>, Wanpen Chaicumpa<sup>2</sup>, Nitat Sookrung<sup>4\*</sup>

<sup>1</sup>Graduate Program in Immunology, Department of Immunology, <sup>2</sup>Laboratory for Research and Technology Development, Department of Parasitology and <sup>4</sup>Office for Research and Development, Faculty of Medicine Siriraj Hospital, Mahidol University, Bangkok 10700, Thailand; <sup>3</sup>Department of Tropical Pathology, Faculty of Tropical Medicine, Mahidol University, Bangkok 10400, Thailand

**S2 Table. Ratios of Specific IgE to IgG1 and IgE to IgG2a in Sera of Vaccinated and Placebo Allergic Mice.**

| Group of mice | IgE:IgG1       | IgE:IgG2a      |
|---------------|----------------|----------------|
| L-P           | 0.314 ± 0.197  | 2.375 ± 1.373  |
| L-cCE         | 0.05 ± 0.037*  | 0.104 ± 0.051* |
| L-nFD1        | 0.145 ± 0.081* | 0.635 ± 0.713* |

\*  $p < 0.05$  compared with L-P by independent  $t$ -test.  $n = 5$  per group.
